# Supplementary material for: Why isn’t everyone using the thermotolerant vaccine? Preferences for Newcastle disease vaccines by chicken-owning households in Tanzania
Source: PLoS One. 2019 Aug 15;14(8):e0220963. doi: 10.1371/journal.pone.0220963 (PMC6695108; doi:10.1371/journal.pone.0220963)
Supplement: S1 Data — (XLS) [file pone.0220963.s005.xls]

## Sheet: Sheet1
DcsnSex	VcnPyMthd	share	VccnPrfr	flock	ever	group	four	vacinfosrc	farming	vactypebi	vacinfolfo	dosecost	Singida1	Mbeya1	village1
Female	Valid skip	Valid skip	Drinking water	18	No	No	No	Not aware of vaccine	Farming is main household income	.a	No		No	No	Arusha2
Female	Valid skip	Valid skip	Drinking water	1	No	No	No	Not aware of vaccine	Farming is main household income	.a	No		No	Yes	Mbeya1
Male	Valid skip	Valid skip	Drinking water	3	No	No	No	Not aware of vaccine	Farming is main household income	.a	No		No	No	Mbeya2
Female	Valid skip	Valid skip	Drinking water	3	No	No	No	Not aware of vaccine	Farming is main household income	.a	No		No	No	Arusha2
Male	Other	Valid skip	Drinking water	9	No	No	No	Not aware of vaccine	Farming is main household income	.a	No		No	No	Arusha1
Female	Valid skip	Valid skip	Drinking water	6	No	No	No	Not aware of vaccine	Farming is main household income	.a	No		No	Yes	Mbeya1
Female	Valid skip	Valid skip	Eyedrops	4	No	No	No	Not aware of vaccine	Farming is main household income	.a	No		No	No	Arusha2
Female	Valid skip	Valid skip	Eyedrops	1	No	No	No	Not aware of vaccine	Farming is main household income	.a	No		Yes	No	Singida1
Female	Valid skip	Valid skip	Drinking water	16	No	No	No	Not aware of vaccine	Farming is main household income	.a	No		No	No	Arusha2
Female	Valid skip	Valid skip	Eyedrops	0	No	Yes	No	Not aware of vaccine	Farming is main household income	.a	No		No	No	Arusha2
Male	Valid skip	Valid skip	Drinking water	8	No	No	No	Not aware of vaccine	Farming is main household income	.a	No		No	No	Mbeya2
Female	Valid skip	Valid skip	Drinking water	14	No	No	No	Not aware of vaccine	Farming is main household income	.a	No		No	No	Mbeya2
Female	Valid skip	Valid skip	Drinking water	10	No	No	No	Not aware of vaccine	Farming is main household income	.a	No		No	No	Mbeya2
Female	Valid skip	Valid skip	Eyedrops	4	No	No	No	Not aware of vaccine	Farming is main household income	.a	No		No	No	Mbeya2
Female	Valid skip	Valid skip	Drinking water	9	No	No	No	Not aware of vaccine	Farming is main household income	.a	No		No	Yes	Mbeya1
Male	Valid skip	Valid skip	Eyedrops	13	No	No	No	Not aware of vaccine	Farming is main household income	.a	No		No	No	Mbeya2
Female	Valid skip	Valid skip	Eyedrops	17	No	No	No	Not aware of vaccine	Farming is main household income	.a	No		Yes	No	Singida1
Female	Valid skip	Valid skip	Eyedrops	0	No	No	No	Not aware of vaccine	Farming is main household income	.a	No		No	No	Arusha2
Female	Valid skip	Valid skip	Drinking water	8	No	No	No	Not aware of vaccine	Other main source of income	.a	No		No	Yes	Mbeya1
Male	Valid skip	Valid skip	Drinking water	0	No	No	No	Not aware of vaccine	Farming is main household income	.a	No		No	No	Mbeya2
Female	Valid skip	Valid skip	Drinking water	0	No	No	No	Not aware of vaccine	Farming is main household income	.a	No		No	No	Arusha2
Female	Valid skip	Valid skip	Drinking water	15	No	Yes	No	Not aware of vaccine	Farming is main household income	.a	No		No	No	Arusha1
Female	Valid skip	Valid skip	Drinking water	0	No	No	No	Not aware of vaccine	Farming is main household income	.a	No		No	No	Arusha2
Female	Valid skip	Valid skip	Drinking water	18	No	No	No	Not aware of vaccine	Other main source of income	.a	No		No	Yes	Mbeya1
Female	Valid skip	Valid skip	Eyedrops	13	No	No	No	Not aware of vaccine	Farming is main household income	.a	No		No	No	Mbeya2
Female	Valid skip	Valid skip	Eyedrops	1	No	No	No	Not aware of vaccine	Farming is main household income	.a	No		No	No	Mbeya2
Female	Valid skip	Valid skip	Drinking water	2	No	No	No	Not aware of vaccine	Farming is main household income	.a	No		Yes	No	Singida1
Female	Valid skip	Valid skip	Drinking water	11	No	No	No	Not aware of vaccine	Other main source of income	.a	No		No	Yes	Mbeya1
Female	Valid skip	Valid skip	Eyedrops	95	No	No	No	Not aware of vaccine	Farming is main household income	.a	No		No	No	Arusha2
Male	Valid skip	Valid skip	Drinking water	2	No	No	No	Not aware of vaccine	Other main source of income	.a	No		No	No	Arusha1
Female	Valid skip	Valid skip	Eyedrops	5	No	No	No	Not aware of vaccine	Other main source of income	.a	No		No	Yes	Mbeya1
Female	Valid skip	Valid skip	Drinking water	9	No	No	No	Not aware of vaccine	Farming is main household income	.a	No		No	No	Arusha2
Female	Valid skip	Valid skip	Eyedrops	0	No	No	No	Not aware of vaccine	Farming is main household income	.a	No		No	No	Arusha2
Female	Valid skip	Valid skip	Drinking water	10	No	No	No	Not aware of vaccine	Farming is main household income	.a	No		No	No	Arusha2
Female	Valid skip	Valid skip	Drinking water	4	No	No	No	Not aware of vaccine	Farming is main household income	.a	No		No	No	Arusha2
Female	Valid skip	Valid skip	Drinking water	0	No	No	No	Not aware of vaccine	Farming is main household income	.a	No		No	Yes	Mbeya1
Female	Valid skip	Valid skip	Eyedrops	8	No	No	No	Not aware of vaccine	Farming is main household income	.a	No		No	Yes	Mbeya1
Female	Valid skip	Valid skip	Drinking water	18	No	No	No	Not aware of vaccine	Other main source of income	.a	No		No	Yes	Mbeya1
Male	Valid skip	Valid skip	Eyedrops	9	No	No	No	Not aware of vaccine	Farming is main household income	.a	No		No	No	Mbeya2
Female	Valid skip	Valid skip	Eyedrops	10	No	No	No	Not aware of vaccine	Farming is main household income	.a	No		No	Yes	Mbeya1
Female	Valid skip	Valid skip	Drinking water	0	No	No	No	Not aware of vaccine	Farming is main household income	.a	No		Yes	No	Singida1
Male	Valid skip	Valid skip	Drinking water	0	No	No	No	Not aware of vaccine	Farming is main household income	.a	No		Yes	No	Singida1
Male	Valid skip	Valid skip	Eyedrops	6	No	No	No	Not aware of vaccine	Other main source of income	.a	No		Yes	No	Singida1
Female	Valid skip	Valid skip	Drinking water	7	No	No	No	Not aware of vaccine	Farming is main household income	.a	No		No	No	Arusha2
Female	Valid skip	Valid skip	Drinking water	14	No	No	No	Not aware of vaccine	Farming is main household income	.a	No		No	No	Arusha2
Female	Valid skip	Valid skip	Eyedrops	14	No	No	No	Not aware of vaccine	Other main source of income	.a	No		No	No	Arusha2
Male	Valid skip	Valid skip	Eyedrops	15	No	No	No	Not aware of vaccine	Farming is main household income	.a	No		Yes	No	Singida1
Female	Valid skip	Valid skip	Drinking water	4	No	No	No	Not aware of vaccine	Other main source of income	.a	No		No	No	Arusha2
Female	Valid skip	Valid skip	Drinking water	17	No	No	No	Not aware of vaccine	Other main source of income	.a	No		No	No	Arusha2
Female	Valid skip	Valid skip	Drinking water	1	No	No	No	Not aware of vaccine	Farming is main household income	.a	No		No	Yes	Mbeya1
Male	Valid skip	Valid skip	Eyedrops	12	No	No	No	Not aware of vaccine	Farming is main household income	.a	No		Yes	No	Singida1
Male	Valid skip	Valid skip	Drinking water	6	No	No	No	Not aware of vaccine	Farming is main household income	.a	No		Yes	No	Singida1
Female	Valid skip	Valid skip	Drinking water	2	No	No	No	Not aware of vaccine	Other main source of income	.a	No		No	No	Arusha2
Female	Valid skip	Valid skip	Drinking water	30	No	Yes	No	Not aware of vaccine	Farming is main household income	.a	No		Yes	No	Singida1
Female	Valid skip	Valid skip	Drinking water	9	No	No	No	Not aware of vaccine	Farming is main household income	.a	No		Yes	No	Singida1
Female	Valid skip	Valid skip	Drinking water	7	No	No	No	Not aware of vaccine	Farming is main household income	.a	No		No	No	Mbeya2
Female	Valid skip	Valid skip	Drinking water	3	No	No	No	Not aware of vaccine	Other main source of income	.a	No		No	No	Arusha2
Female	Valid skip	Valid skip	Eyedrops	7	No	No	No	Not aware of vaccine	Farming is main household income	.a	No		No	No	Mbeya2
Female	Valid skip	Valid skip	Drinking water	1	No	No	No	Not aware of vaccine	Other main source of income	.a	No		No	Yes	Mbeya1
Female	Valid skip	Valid skip	Drinking water	19	No	No	No	Not aware of vaccine	Farming is main household income	.a	No		No	No	Arusha1
Female	Valid skip	Valid skip	Drinking water	8	No	No	No	Not aware of vaccine	Farming is main household income	.a	No		No	No	Arusha2
Female	Valid skip	Valid skip	Eyedrops	3	No	No	No	Not aware of vaccine	Farming is main household income	.a	No		No	No	Mbeya2
Female	Valid skip	Valid skip	Eyedrops	0	No	No	No	Not aware of vaccine	Other main source of income	.a	No		No	No	Arusha2
Female	Valid skip	Valid skip	Eyedrops	9	No	No	No	Not aware of vaccine	Farming is main household income	.a	No		No	No	Mbeya2
Male	Valid skip	Valid skip	Drinking water	4	No	No	No	Not aware of vaccine	Farming is main household income	.a	No		No	Yes	Mbeya1
Female	Valid skip	Valid skip	Drinking water	6	No	No	No	Not aware of vaccine	Farming is main household income	.a	No		No	No	Arusha2
Male	Valid skip	Valid skip	Drinking water	11	No	No	No	Not aware of vaccine	Farming is main household income	.a	No		Yes	No	Singida1
Female	Valid skip	Valid skip	Eyedrops	9	No	No	No	Not aware of vaccine	Other main source of income	.a	No		No	Yes	Mbeya1
Female	Valid skip	Valid skip	Drinking water	6	No	No	No	Not aware of vaccine	Farming is main household income	.a	No		No	No	Arusha2
Female	Valid skip	Valid skip	Drinking water	2	No	No	No	Not aware of vaccine	Farming is main household income	.a	No		No	No	Arusha2
Female	Valid skip	Valid skip	Eyedrops	4	No	No	No	Not aware of vaccine	Farming is main household income	.a	No		No	No	Arusha2
Female	Valid skip	Valid skip	Drinking water	0	No	No	No	Not aware of vaccine	Farming is main household income	.a	No		No	No	Arusha1
Male	Valid skip	Valid skip	Drinking water	14	No	No	No	Not aware of vaccine	Farming is main household income	.a	No		Yes	No	Singida1
Female	Valid skip	Valid skip	Eyedrops	7	No	Yes	No	Not aware of vaccine	Farming is main household income	.a	No		No	No	Arusha1
Female	Valid skip	Valid skip	Eyedrops	4	No	No	No	Not aware of vaccine	Farming is main household income	.a	No		No	No	Mbeya2
Female	Valid skip	Valid skip	Eyedrops	0	No	No	No	Not aware of vaccine	Farming is main household income	.a	No		No	No	Arusha2
Female	Valid skip	Valid skip	Drinking water	15	No	No	No	Not aware of vaccine	Farming is main household income	.a	No		No	No	Arusha1
Male	Valid skip	Valid skip	Drinking water	24	No	Yes	No	Not aware of vaccine	Farming is main household income	.a	No		No	No	Arusha1
Female	Valid skip	Valid skip	Drinking water	11	No	No	No	Not aware of vaccine	Farming is main household income	.a	No		No	No	Arusha2
Male	Valid skip	Valid skip	Drinking water	2	No	No	No	Not aware of vaccine	Farming is main household income	.a	No		Yes	No	Singida1
Female	Valid skip	Valid skip	Eyedrops	7	No	No	No	Not aware of vaccine	Other main source of income	.a	No		No	No	Arusha2
Female	Valid skip	Valid skip	Drinking water	12	No	No	No	Not aware of vaccine	Farming is main household income	.a	No		No	Yes	Mbeya1
Female	Valid skip	Valid skip	Eyedrops	6	No	No	No	Not aware of vaccine	Farming is main household income	.a	No		No	No	Arusha2
Male	Valid skip	Valid skip	Drinking water	50	No	No	No	Not aware of vaccine	Farming is main household income	.a	No		No	No	Mbeya2
Female	Valid skip	Valid skip	Drinking water	3	No	No	No	Not aware of vaccine	Other main source of income	.a	No		No	No	Arusha2
Female	Valid skip	Valid skip	Drinking water	3	No	No	No	Not aware of vaccine	Farming is main household income	.a	No		No	No	Arusha1
Female	Valid skip	Valid skip	Eyedrops	4	No	No	No	Not aware of vaccine	Farming is main household income	.a	No		No	No	Arusha2
Female	Valid skip	Valid skip	Eyedrops	9	No	No	No	Not aware of vaccine	Other main source of income	.a	No		No	Yes	Mbeya1
Female	Valid skip	Valid skip	Drinking water	5	No	No	No	Not aware of vaccine	Farming is main household income	.a	No		No	No	Arusha2
Male	Valid skip	Valid skip	Drinking water	14	No	No	No	Not aware of vaccine	Other main source of income	.a	No		No	No	Singida2
Female	Valid skip	Valid skip	Eyedrops	9	No	No	No	Not aware of vaccine	Farming is main household income	.a	No		No	No	Arusha2
Female	Valid skip	Valid skip	Drinking water	6	No	No	No	Not aware of vaccine	Farming is main household income	.a	No		No	No	Arusha2
Female	Valid skip	Valid skip	Eyedrops	2	No	No	No	Not aware of vaccine	Farming is main household income	.a	No		No	No	Arusha2
Male	Valid skip	Valid skip	Drinking water	0	No	No	No	Not aware of vaccine	Farming is main household income	.a	No		Yes	No	Singida1
Female	Valid skip	Valid skip	Eyedrops	0	No	No	No	Not aware of vaccine	Farming is main household income	.a	No		No	No	Arusha2
Female	Valid skip	Valid skip	Drinking water	10	No	No	No	Not aware of vaccine	Farming is main household income	.a	No		No	No	Arusha2
Female	Valid skip	Valid skip	Drinking water	6	No	No	No	Not aware of vaccine	Farming is main household income	.a	No		No	No	Arusha2
Female	Valid skip	Valid skip	Drinking water	5	No	No	No	Not aware of vaccine	Farming is main household income	.a	No		No	No	Mbeya2
Female	Valid skip	Valid skip	Eyedrops	5	No	No	No	Not aware of vaccine	Farming is main household income	.a	No		No	No	Arusha2
Female	Valid skip	Valid skip	Eyedrops	4	No	No	No	Not aware of vaccine	Farming is main household income	.a	No		No	No	Arusha2
Female	Valid skip	Valid skip	Drinking water	13	No	No	No	Not aware of vaccine	Other main source of income	.a	No		No	No	Arusha1
Male	Valid skip	Valid skip	Eyedrops	33	No	No	No	Not aware of vaccine	Other main source of income	.a	No		No	No	Singida2
Female	Valid skip	Valid skip	Eyedrops	1	No	No	No	Not aware of vaccine	Farming is main household income	.a	No		No	No	Arusha2
Female	Valid skip	Valid skip	Eyedrops	45	No	No	No	Not aware of vaccine	Farming is main household income	.a	No		No	No	Singida2
Female	Valid skip	Valid skip	Drinking water	0	No	No	No	Not aware of vaccine	Farming is main household income	.a	No		Yes	No	Singida1
Male	Cash	Yes	Drinking water	7	Yes	No	Yes	Chicken raising group	Farming is main household income	La Sota	No	1.73798	Yes	No	Singida1
Male	Cash	Yes	Eyedrops	7	Yes	No	No	Community member	Farming is main household income	I-2	No	1.46713	No	No	Singida2
Male	Cash	Yes	Eyedrops	18	Yes	No	No	Chicken raising group	Farming is main household income	La Sota	No	9.82338	No	Yes	Mbeya1
Female	Cash	Yes	Drinking water	0	Yes	No	No	Friend	Farming is main household income	I-2	No	21.2647	No	No	Mbeya2
Female	Free	Yes	Eyedrops	13	Yes	Yes	No	Community member	Other main source of income	I-2	No	6.64523	No	No	Arusha1
Female	Cash	No	Eyedrops	6	Yes	No	Yes	Chicken raising group	Farming is main household income	I-2	No	52.7188	No	No	Mbeya2
Male	Valid skip	Valid skip	Eyedrops	2	No	No	No	Chicken raising group	Farming is main household income	.a	No		Yes	No	Singida1
Male	Cash	Yes	Drinking water	8	Yes	No	No	Community member	Farming is main household income	I-2	No	2.25938	No	No	Singida2
Male	Cash	No	Drinking water	10	Yes	No	Yes	Friend	Farming is main household income	La Sota	No	6.77813	No	No	Singida2
Female	Cash	No	Drinking water	19	Yes	No	No	Agrovet shop	Farming is main household income	La Sota	No	11.2969	No	No	Arusha2
Female	Cash	Yes	Drinking water	33	Yes	Yes	Yes	NGO	Farming is main household income	La Sota	No	7.97427	No	No	Arusha1
Female	Cash	No	Eyedrops	14	Yes	No	No	Other	Farming is main household income	I-2	No	3.22768	No	No	Singida2
Male	Cash	Yes	Eyedrops	10	Yes	No	Yes	Livestock officer	Other main source of income	I-2	Yes	27.1125	No	No	Mbeya2
Female	Cash	Yes	Drinking water	15	Yes	No	No	Friend	Farming is main household income	La Sota	No	10.845	No	Yes	Mbeya1
Female	Cash	Yes	Eyedrops	9	Yes	No	No	Agrovet shop	Other main source of income	I-2	No	8.68991	Yes	No	Singida1
Female	Valid skip	Valid skip	Eyedrops	4	No	No	No	Community member	Farming is main household income	.a	No		No	No	Arusha2
Female	Valid skip	Valid skip	Drinking water	1	No	No	No	Community member	Farming is main household income	.a	No		No	No	Arusha2
Female	Cash	Yes	Eyedrops	16	Yes	No	Yes	Livestock officer	Farming is main household income	I-2	Yes	15.0625	No	No	Mbeya2
Female	Valid skip	Valid skip	Drinking water	1	No	No	No	Friend	Other main source of income	.a	No		No	Yes	Mbeya1
Male	Cash	Yes	Eyedrops	9	Yes	No	No	Agrovet shop	Farming is main household income	I-2	No	15.8156	No	Yes	Mbeya1
Female	Free	No	Eyedrops	12	Yes	Yes	No	NGO	Farming is main household income	I-2	No	0	No	No	Arusha1
Male	Cash	No	Eyedrops	16	Yes	No	Yes	Agrovet shop	Farming is main household income	La Sota	No	21.0875	No	Yes	Mbeya1
Male	Group contribution	Yes	Eyedrops	4	Yes	Yes	No	Livestock officer	Farming is main household income	La Sota	Yes	3.0125	No	No	Arusha1
Female	Valid skip	Valid skip	Eyedrops	22	No	No	No	Family member	Farming is main household income	.a	No		No	Yes	Mbeya1
Female	Cash	Yes	Eyedrops	7	Yes	No	No	Family member	Farming is main household income	I-2	No		No	Yes	Mbeya1
Male	Valid skip	Valid skip	Drinking water	70	No	Yes	No	Friend	Farming is main household income	.a	No		No	No	Arusha2
Male	Cash	Yes	Eyedrops	77	Yes	No	No	Friend	Other main source of income	I-2	No	3.47596	No	No	Singida2
Female	Cash	No	Eyedrops	136	Yes	No	Yes	Livestock officer	Farming is main household income	La Sota	Yes	2.08558	No	No	Arusha2
Female	Cash	Yes	Eyedrops	30	Yes	No	No	Friend	Farming is main household income	I-2	No	15.0625	No	No	Singida2
Female	Cash	Yes	Eyedrops	4	Yes	No	Yes	Community member	Farming is main household income	I-2	No	11.2969	No	No	Arusha2
Female	Free	No	Eyedrops	10	Yes	Yes	No	Livestock officer	Other main source of income	I-2	Yes		No	No	Arusha1
Female	Valid skip	Valid skip	Drinking water	10	No	No	No	Community member	Farming is main household income	.a	No		No	Yes	Mbeya1
Male	Cash	No	Eyedrops	32	Yes	No	No	Friend	Farming is main household income	I-2	No	3.76563	No	No	Arusha2
Male	Cash	Yes	Drinking water	15	Yes	Yes	Yes	NGO	Farming is main household income	La Sota	No	19.3661	Yes	No	Singida1
Female	Cash	Yes	Drinking water	4	Yes	No	Yes	Livestock officer	Farming is main household income	La Sota	Yes	3.76563	Yes	No	Singida1
Male	Cash	Yes	Drinking water	26	Yes	Yes	Yes	Chicken raising group	Farming is main household income	La Sota	No	22.5938	Yes	No	Singida1
Female	Free	No	Eyedrops	10	Yes	No	No	Community member	Farming is main household income	I-2	No		No	No	Arusha1
Male	Valid skip	Valid skip	Drinking water	13	No	No	No	Family member	Farming is main household income	.a	No		No	No	Arusha2
Female	Cash	Yes	Drinking water	10	Yes	No	No	Community member	Farming is main household income	I-2	No		No	No	Arusha2
Female	Free	Yes	Eyedrops	21	Yes	No	No	Community member	Farming is main household income	I-2	No	2.25938	No	No	Singida2
Female	Cash	Yes	Drinking water	0	Yes	No	No	Community member	Farming is main household income	La Sota	No	4.51875	No	Yes	Mbeya1
Male	Valid skip	Valid skip	Eyedrops	10	No	No	No	Livestock officer	Farming is main household income	.a	Yes		Yes	No	Singida1
Female	Valid skip	Valid skip	Drinking water	0	No	No	No	Community member	Farming is main household income	.a	No		No	No	Mbeya2
Female	Free	Yes	Drinking water	15	Yes	No	Yes	Community member	Other main source of income	La Sota	No	0	No	Yes	Mbeya1
Female	Cash	Yes	Drinking water	313	Yes	Yes	Yes	NGO	Other main source of income	La Sota	No	0.903751	No	No	Arusha1
Female	Cash	No	Eyedrops	0	Yes	Yes	No	Other	Farming is main household income	La Sota	No	26.3594	No	No	Mbeya2
Female	Cash	Yes	Drinking water	11	Yes	No	No	Agrovet shop	Farming is main household income	La Sota	No	6.95193	No	Yes	Mbeya1
Female	Cash	No	Drinking water	9	No	No	No	Community member	Farming is main household income	.a	No		No	No	Arusha1
Male	Cash	Yes	Drinking water	25	Yes	No	No	Friend	Farming is main household income	I-2	No	7.53125	No	Yes	Mbeya1
Female	Free	No	Eyedrops	16	Yes	Yes	No	NGO	Other main source of income	I-2	No	0	No	No	Arusha1
Female	Free	No	Drinking water	6	Yes	No	No	NGO	Farming is main household income	I-2	No	0	No	No	Arusha1
Female	Cash	No	Eyedrops	18	Yes	No	No	Livestock officer	Farming is main household income	La Sota	Yes	1.50625	Yes	No	Singida1
Female	Free	No	Drinking water	4	Yes	No	Yes	Chicken raising group	Farming is main household income	I-2	No	0	No	No	Arusha1
Male	Valid skip	Valid skip	Drinking water	1	No	No	No	Friend	Farming is main household income	.a	No		Yes	No	Singida1
Female	Cash	No	Eyedrops	34	Yes	No	Yes	Agrovet shop	Farming is main household income	I-2	No	9.03751	No	No	Arusha2
Male	Cash	No	Drinking water	1	Yes	No	No	Community member	Farming is main household income	La Sota	No	0	Yes	No	Singida1
Male	Cash	Yes	Eyedrops	25	Yes	No	Yes	Family member	Farming is main household income	La Sota	No	0.903751	Yes	No	Singida1
Male	Valid skip	Valid skip	Drinking water	11	No	No	No	Community member	Farming is main household income	.a	No		Yes	No	Singida1
Female	Valid skip	Valid skip	Drinking water	3	No	No	No	Friend	Farming is main household income	.a	No		No	Yes	Mbeya1
Male	Cash	Yes	Drinking water	49	Yes	Yes	Yes	Community member	Farming is main household income	La Sota	No	6.025	No	No	Mbeya2
Female	Free	No	Eyedrops	9	Yes	No	Yes	Community member	Farming is main household income	La Sota	No		No	Yes	Mbeya1
Male	Cash	Yes	Drinking water	6	Yes	No	Yes	Chicken raising group	Farming is main household income	La Sota	No	0.821591	Yes	No	Singida1
Male	Cash	No	Eyedrops	24	Yes	No	Yes	Livestock officer	Farming is main household income	I-2	Yes	18.075	No	No	Mbeya2
Female	Valid skip	Valid skip	Eyedrops	7	No	No	No	Community member	Other main source of income	.a	No		No	Yes	Mbeya1
Female	Valid skip	Valid skip	Eyedrops	10	No	No	No	Livestock officer	Farming is main household income	.a	Yes		No	No	Arusha2
Female	Valid skip	Valid skip	Eyedrops	0	No	No	No	Livestock officer	Other main source of income	.a	Yes		No	Yes	Mbeya1
Female	Valid skip	Valid skip	Eyedrops	3	No	No	Yes	Community member	Farming is main household income	.a	No		No	No	Mbeya2
Female	Cash	Yes	Drinking water	1	Yes	No	Yes	Community member	Farming is main household income	I-2	No	4.51875	No	No	Arusha2
Male	Cash	Yes	Drinking water	20	Yes	No	Yes	Family member	Farming is main household income	La Sota	No	0	Yes	No	Singida1
Female	Valid skip	Valid skip	Eyedrops	0	No	No	No	Other	Farming is main household income	.a	No		No	No	Mbeya2
Male	Cash	Yes	Eyedrops	16	Yes	No	Yes	Community member	Farming is main household income	I-2	No	2.25938	No	No	Singida2
Male	Cash	No	Drinking water	12	Yes	No	Yes	Family member	Farming is main household income	La Sota	No	19.3661	No	Yes	Mbeya1
Female	Free	No	Eyedrops	1	Yes	No	No	Community member	Farming is main household income	La Sota	No	0	No	Yes	Mbeya1
Male	Valid skip	Valid skip	Drinking water	13	No	No	No	Community member	Farming is main household income	.a	No		No	No	Singida2
Male	Cash	No	Eyedrops	14	Yes	No	No	Livestock officer	Farming is main household income	La Sota	Yes	2.25938	Yes	No	Singida1
Male	Valid skip	Valid skip	Drinking water	7	No	No	No	Community member	Farming is main household income	.a	No		Yes	No	Singida1
Female	Valid skip	Valid skip	Drinking water	7	No	No	No	Community member	Farming is main household income	.a	No		No	No	Singida2
Male	Cash	No	Eyedrops	0	Yes	No	No	Community member	Farming is main household income	I-2	No	9.03751	No	No	Mbeya2
Female	Cash	Yes	Eyedrops	21	Yes	No	No	Family member	Farming is main household income	La Sota	No	90.3751	No	No	Mbeya2
Female	Valid skip	Valid skip	Drinking water	18	No	No	No	Livestock officer	Farming is main household income	.a	Yes		No	No	Arusha2
Male	Cash	Yes	Drinking water	15	Yes	No	Yes	Community member	Farming is main household income	La Sota	No	3.0125	No	Yes	Mbeya1
Male	Cash	Yes	Eyedrops	6	Yes	No	No	Media	Other main source of income	I-2	No	0.903751	No	No	Mbeya2
Female	Cash	Yes	Drinking water	5	Yes	Yes	No	Community member	Farming is main household income	La Sota	No	18.075	No	No	Arusha1
Female	Valid skip	Valid skip	Drinking water	30	No	No	No	Friend	Other main source of income	.a	No		No	No	Mbeya2
Female	Cash	Yes	Drinking water	7	Yes	No	Yes	Friend	Farming is main household income	I-2	No	2.25938	No	No	Singida2
Female	Valid skip	Valid skip	Eyedrops	2	No	No	No	Community member	Farming is main household income	.a	No		Yes	No	Singida1
Female	Valid skip	Valid skip	Eyedrops	0	No	No	No	Community member	Farming is main household income	.a	No		No	No	Mbeya2
Male	Cash	No	Drinking water	10	Yes	No	No	Community member	Farming is main household income	La Sota	No	54.225	No	Yes	Mbeya1
Male	Cash	Yes	Eyedrops	37	Yes	No	No	Community member	Farming is main household income	I-2	No	11.2969	No	No	Singida2
Female	Valid skip	Valid skip	Drinking water	2	No	No	No	Friend	Other main source of income	.a	No		No	No	Arusha2
Male	Cash	Yes	Eyedrops	36	Yes	Yes	Yes	Chicken raising group	Farming is main household income	La Sota	No	0.645536	Yes	No	Singida1
Female	Cash	Yes	Eyedrops	48	Yes	No	Yes	Friend	Farming is main household income	I-2	No	9.03751	No	No	Singida2
Female	Cash	Yes	Drinking water	0	Yes	No	No	Agrovet shop	Farming is main household income	La Sota	No	22.5938	No	No	Mbeya2
Female	Cash	Yes	Eyedrops	5	Yes	No	No	Livestock officer	Farming is main household income	I-2	Yes	0.112969	No	No	Arusha1
Female	Cash	Yes	Drinking water	2	Yes	No	Yes	Friend	Farming is main household income	La Sota	No	2.25938	No	No	Singida2
Male	Cash	Yes	Eyedrops	20	Yes	Yes	No	Community member	Other main source of income	La Sota	No	10.5438	No	No	Arusha1
Male	Cash	No	Eyedrops	0	Yes	No	No	Community member	Farming is main household income	La Sota	No	7.53125	No	No	Singida2
Female	Cash	Yes	Eyedrops	4	Yes	No	Yes	Community member	Farming is main household income	La Sota	No	5.64844	No	Yes	Mbeya1
Male	Valid skip	Valid skip	Drinking water	9	No	No	No	Community member	Farming is main household income	.a	No		No	No	Singida2
Male	Cash	Yes	Eyedrops	19	Yes	No	Yes	Community member	Farming is main household income	I-2	No	7.53125	No	No	Singida2
Female	Cash	No	Drinking water	9	Yes	No	Yes	Agrovet shop	Farming is main household income	La Sota	No	6.77813	No	No	Mbeya2
Female	Valid skip	Valid skip	Eyedrops	6	No	No	No	Chicken raising group	Farming is main household income	.a	No		Yes	No	Singida1
Female	Valid skip	Valid skip	Drinking water	1	No	No	No	Livestock officer	Farming is main household income	.a	Yes		Yes	No	Singida1
Female	Valid skip	Valid skip	Drinking water	0	No	No	No	Family member	Farming is main household income	.a	No		No	No	Arusha2
Female	Cash	Yes	Eyedrops	19	Yes	No	Yes	Livestock officer	Other main source of income	I-2	Yes	4.51875	No	No	Singida2
Female	Free	No	Drinking water	16	Yes	No	No	NGO	Other main source of income	I-2	No		No	No	Arusha1
Male	Cash	Yes	Eyedrops	13	Yes	No	Yes	Family member	Farming is main household income	I-2	No	4.51875	No	No	Singida2
Male	Valid skip	Valid skip	Drinking water	0	No	No	No	Friend	Farming is main household income	.a	No		No	No	Arusha2
Female	Cash	No	Eyedrops	22	Yes	No	No	Livestock officer	Farming is main household income	I-2	Yes	3.615	Yes	No	Singida1
Female	Cash	Yes	Drinking water	13	Yes	Yes	Yes	Community member	Farming is main household income	I-2	No	17.3798	No	No	Singida2
Female	Cash	Yes	Drinking water	2	Yes	No	No	Community member	Farming is main household income	La Sota	No	8.47266	Yes	No	Singida1
Male	Cash	Yes	Eyedrops	26	Yes	No	Yes	Livestock officer	Farming is main household income	I-2	Yes	4.84152	No	No	Singida2
Male	Cash	Yes	Drinking water	6	Yes	No	Yes	Friend	Farming is main household income	La Sota	No	0	Yes	No	Singida1
Female	Cash	Yes	Eyedrops	7	Yes	No	Yes	Community member	Farming is main household income	I-2	No	4.51875	No	No	Singida2
Female	Free	Yes	Eyedrops	3	Yes	No	Yes	Friend	Farming is main household income	La Sota	No	0	No	No	Arusha2
Female	Cash	No	Eyedrops	27	Yes	No	Yes	Family member	Farming is main household income	La Sota	No	25.1042	No	No	Mbeya2
Male	Valid skip	Valid skip	Eyedrops	0	No	No	No	Family member	Farming is main household income	.a	No		No	No	Singida2
Male	Cash	Yes	Eyedrops	6	Yes	Yes	No	Chicken raising group	Farming is main household income	La Sota	No	0.18075	Yes	No	Singida1
Male	Cash	Yes	Eyedrops	11	Yes	No	No	Community member	Farming is main household income	La Sota	No	2.25938	No	No	Singida2
Female	Valid skip	Valid skip	Drinking water	5	No	No	No	Livestock officer	Farming is main household income	.a	Yes		No	No	Arusha1
Male	Cash	No	Drinking water	51	Yes	No	No	Agrovet shop	Farming is main household income	La Sota	No	13.5563	No	No	Mbeya2
Female	Cash	No	Eyedrops	0	Yes	No	Yes	Family member	Farming is main household income	La Sota	No	2.25938	No	No	Singida2
Male	Cash	No	Eyedrops	0	Yes	No	Yes	Community member	Farming is main household income	I-2	No	2.25938	No	No	Singida2
Female	Cash	Yes	Drinking water	7	Yes	No	Yes	Livestock officer	Farming is main household income	La Sota	Yes	32.2768	No	Yes	Mbeya1
Female	Cash	No	Eyedrops	8	Yes	No	No	Livestock officer	Farming is main household income	I-2	Yes	3.76563	Yes	No	Singida1
Male	Cash	Yes	Eyedrops	0	Yes	No	No	Chicken raising group	Farming is main household income	La Sota	No		No	No	Mbeya2
Female	Free	No	Drinking water	9	Yes	No	No	NGO	Farming is main household income	I-2	No	0	No	No	Arusha1
Male	Cash	Yes	Drinking water	10	Yes	No	No	Friend	Farming is main household income	La Sota	No	13.5563	No	No	Mbeya2
Male	Cash	No	Eyedrops	25	Yes	No	Yes	Community member	Farming is main household income	La Sota	No	7.53125	No	No	Singida2
Male	Valid skip	Valid skip	Drinking water	9	No	No	No	Friend	Farming is main household income	.a	No		No	No	Singida2
Female	Valid skip	Valid skip	Drinking water	1	No	No	No	Friend	Farming is main household income	.a	No		No	No	Arusha2
Female	Valid skip	No	Drinking water	7	No	No	No	Community member	Farming is main household income	.a	No		No	No	Arusha1
Male	Free	Yes	Invalid skip	3	Yes	No	Yes	Livestock officer	Farming is main household income	I-2	Yes	28.2422	No	No	Mbeya2
Male	Cash	Yes	Drinking water	7	Yes	No	Yes	Other	Farming is main household income	La Sota	No	20.5398	No	Yes	Mbeya1
Male	Cash	Yes	Drinking water	48	Yes	Yes	Yes	Chicken raising group	Farming is main household income	La Sota	No	0.941407	Yes	No	Singida1
Male	Cash	Yes	Drinking water	15	Yes	No	Yes	Community member	Farming is main household income	I-2	No	4.51875	No	No	Singida2
Female	Cash	Yes	Drinking water	16	Yes	No	Yes	Family member	Farming is main household income	La Sota	No	5.02084	No	Yes	Mbeya1
Female	Cash	Yes	Eyedrops	0	Yes	No	No	Chicken raising group	Farming is main household income	La Sota	No	75.3125	No	No	Mbeya2
Female	Cash	Yes	Drinking water	38	Yes	Yes	No	NGO	Farming is main household income	I-2	No	3.0125	No	No	Arusha1
Female	Cash	Yes	Eyedrops	28	Yes	Yes	Yes	NGO	Farming is main household income	La Sota	No	0.376563	Yes	No	Singida1
Male	Valid skip	Valid skip	Eyedrops	9	No	No	No	NGO	Farming is main household income	.a	No		No	Yes	Mbeya1
Male	Cash	Yes	Eyedrops	12	Yes	No	Yes	Other	Farming is main household income	La Sota	No	0	Yes	No	Singida1
Male	Cash	Yes	Eyedrops	25	Yes	No	No	Livestock officer	Farming is main household income	I-2	Yes	7.53125	No	No	Mbeya2
Female	Valid skip	Valid skip	Eyedrops	0	No	No	No	Community member	Farming is main household income	.a	No		No	No	Singida2
Female	Cash	Yes	Drinking water	10	Yes	No	Yes	Agrovet shop	Farming is main household income	La Sota	No	11.2969	No	Yes	Mbeya1
Female	Cash	Yes	Eyedrops	24	Yes	Yes	Yes	Seminar	Farming is main household income	I-2	No	19.3661	No	No	Singida2
Female	Cash	Yes	Eyedrops	0	Yes	No	No	Community member	Farming is main household income	I-2	No	4.51875	No	No	Singida2
Female	Valid skip	Valid skip	Drinking water	1	No	No	No	Livestock officer	Farming is main household income	.a	Yes		No	No	Singida2
Female	Cash	Yes	Eyedrops	9	Yes	No	No	Community member	Farming is main household income	I-2	No	2.25938	No	No	Singida2
Female	Cash	No	Eyedrops	11	Yes	Yes	Yes	Livestock officer	Farming is main household income	La Sota	Yes	7.53125	No	Yes	Mbeya1
Male	Valid skip	Valid skip	Eyedrops	40	No	No	No	Community member	Farming is main household income	.a	No		No	No	Singida2
Female	Valid skip	Valid skip	Eyedrops	6	No	No	No	Family member	Farming is main household income	.a	No		No	No	Singida2
Female	Cash	No	Eyedrops	13	Yes	No	No	Community member	Farming is main household income	La Sota	No	17.3798	No	No	Mbeya2
Male	Valid skip	Valid skip	Eyedrops	16	No	No	No	Livestock officer	Farming is main household income	.a	Yes		Yes	No	Singida1
Male	Cash	Yes	Drinking water	33	Yes	Yes	Yes	Seminar	Farming is main household income	La Sota	No	0.265809	Yes	No	Singida1
Male	Cash	Yes	Eyedrops	35	Yes	No	Yes	Livestock officer	Other main source of income	I-2	Yes	7.97427	No	No	Singida2
Female	Valid skip	Valid skip	Drinking water	7	No	No	No	Community member	Other main source of income	.a	No		No	Yes	Mbeya1
Female	Cash	Yes	Eyedrops	8	Yes	No	Yes	Family member	Farming is main household income	I-2	No	28.7557	No	No	Singida2
Male	Free	No	Drinking water	9	Yes	No	Yes	Community member	Farming is main household income	La Sota	No	0	Yes	No	Singida1
Female	Cash	Yes	Eyedrops	11	Yes	No	Yes	Livestock officer	Farming is main household income	I-2	Yes	25.1042	No	No	Singida2
Female	Valid skip	Valid skip	Eyedrops	4	No	No	No	Friend	Farming is main household income	.a	No		No	Yes	Mbeya1
Male	Valid skip	Valid skip	Eyedrops	10	No	No	No	Community member	Farming is main household income	.a	No		No	No	Singida2
Female	Valid skip	Valid skip	Eyedrops	0	No	No	No	Livestock officer	Farming is main household income	.a	Yes		Yes	No	Singida1
Female	Valid skip	Valid skip	Drinking water	3	No	No	No	Friend	Other main source of income	.a	No		No	No	Singida2
Female	Cash	Yes	Eyedrops	22	Yes	No	No	Friend	Farming is main household income	I-2	No	7.13487	No	No	Singida2
Female	Valid skip	Valid skip	Eyedrops	11	No	Yes	No	NGO	Other main source of income	.a	No		No	No	Arusha1
Female	Group contribution	Yes	Drinking water	31	Yes	No	Yes	Livestock officer	Other main source of income	La Sota	Yes	1.50625	Yes	No	Singida1
Female	Valid skip	Valid skip	Drinking water	22	No	No	Yes	NGO	Farming is main household income	.a	No		No	No	Singida2
Female	Cash	Yes	Eyedrops	11	Yes	No	No	Community member	Farming is main household income	I-2	No	15.0625	No	No	Singida2
Male	Cash	Yes	Drinking water	7	Yes	No	No	Friend	Farming is main household income	I-2	No	14.2697	No	No	Singida2
Male	Cash	Yes	Eyedrops	25	Yes	No	No	Community member	Farming is main household income	I-2	No	6.45536	No	No	Singida2
Male	Valid skip	Valid skip	Eyedrops	5	No	No	No	Friend	Farming is main household income	.a	No		No	No	Singida2
Female	Cash	Yes	Eyedrops	13	Yes	No	Yes	Community member	Farming is main household income	I-2	No	6.77813	No	No	Singida2
Male	Cash	No	Eyedrops	44	Yes	No	No	Family member	Other main source of income	I-2	No		No	Yes	Mbeya1
Male	Valid skip	Valid skip	Drinking water	12	No	No	No	Family member	Farming is main household income	.a	No		Yes	No	Singida1
Female	Valid skip	Valid skip	Drinking water	10	No	No	No	Community member	Other main source of income	.a	No		Yes	No	Singida1
Male	Cash	Yes	Eyedrops	10	Yes	No	Yes	Friend	Farming is main household income	I-2	No	7.90782	No	No	Singida2
Male	Cash	No	Eyedrops	11	Yes	No	No	Livestock officer	Farming is main household income	I-2	Yes	11.2969	No	No	Mbeya2
Male	Valid skip	Valid skip	Drinking water	22	No	No	No	Community member	Farming is main household income	.a	No		No	No	Arusha1
Female	Cash	No	Eyedrops	1	Yes	No	No	Community member	Farming is main household income	La Sota	No		No	No	Arusha2
Female	Group contribution	Yes	Drinking water	14	Yes	Yes	Yes	Chicken raising group	Farming is main household income	La Sota	No	0.392935	Yes	No	Singida1
Female	Valid skip	Valid skip	Eyedrops	5	No	No	No	Community member	Farming is main household income	.a	No		Yes	No	Singida1
Male	Valid skip	Valid skip	Eyedrops	39	No	No	No	Friend	Farming is main household income	.a	No		Yes	No	Singida1
Male	Cash	No	Drinking water	13	Yes	No	Yes	Community member	Farming is main household income	I-2	No	5.27188	No	No	Singida2
Male	Valid skip	Valid skip	Drinking water	22	No	No	No	Community member	Other main source of income	.a	No		No	No	Arusha1
Female	Free	No	Drinking water	3	Yes	No	Yes	Livestock officer	Farming is main household income	La Sota	Yes	0	Yes	No	Singida1
Female	Cash	Yes	Eyedrops	0	Yes	No	No	Other	Farming is main household income	La Sota	No	5.64844	No	No	Mbeya2
Male	Valid skip	Valid skip	Drinking water	38	No	No	No	Friend	Other main source of income	.a	No		No	No	Arusha2
Male	Cash	Yes	Eyedrops	15	Yes	No	Yes	Agrovet shop	Other main source of income	La Sota	No	15.0625	No	No	Singida2
Female	Cash	Yes	Eyedrops	7	Yes	No	No	Community member	Farming is main household income	I-2	No	3.34722	No	No	Mbeya2
Female	Free	No	Drinking water	26	Yes	Yes	No	NGO	Farming is main household income	I-2	No	0	No	No	Arusha1
Female	Cash	Yes	Drinking water	1	Yes	No	No	Community member	Other main source of income	La Sota	No	2.51042	No	Yes	Mbeya1
Female	Valid skip	Valid skip	Eyedrops	15	No	Yes	No	Chicken raising group	Farming is main household income	.a	No		No	No	Arusha1
Male	Cash	No	Eyedrops	0	Yes	No	No	Media	Farming is main household income	I-2	No		No	Yes	Mbeya1
Female	Valid skip	Valid skip	Drinking water	9	No	No	No	Community member	Farming is main household income	.a	No		No	No	Mbeya2
Female	Cash	Yes	Drinking water	3	Yes	No	No	Community member	Farming is main household income	La Sota	No	11.2969	No	Yes	Mbeya1
Female	Other	No	Drinking water	4	Yes	No	Yes	Other	Farming is main household income	La Sota	No	0	No	No	Singida2
Female	Free	No	Eyedrops	9	Yes	No	No	Seminar	Farming is main household income	I-2	No	0	No	No	Arusha1
Female	Valid skip	Valid skip	Drinking water	5	No	No	No	Community member	Farming is main household income	.a	No		No	No	Arusha1
Male	Other	No	Eyedrops	20	Yes	No	Yes	Family member	Farming is main household income	La Sota	No	0	Yes	No	Singida1
Male	Valid skip	Valid skip	Eyedrops	24	No	No	No	Livestock officer	Other main source of income	.a	Yes		No	No	Arusha2
Male	Free	No	Drinking water	12	Yes	No	No	Livestock officer	Farming is main household income	I-2	Yes	0	No	No	Arusha1
Male	Cash	Yes	Drinking water	11	Yes	No	Yes	Friend	Farming is main household income	I-2	No	2.25938	No	No	Singida2
Female	Cash	Yes	Drinking water	2	Yes	No	Yes	Family member	Farming is main household income	La Sota	No	45.1875	No	No	Mbeya2
Male	Cash	Yes	Drinking water	10	Yes	No	No	Livestock officer	Farming is main household income	La Sota	Yes	1.96468	No	No	Mbeya2
Female	Cash	Yes	Drinking water	0	Yes	No	No	Community member	Farming is main household income	I-2	No	2.25938	No	No	Singida2
Male	Cash	No	Drinking water	2	Yes	No	No	Family member	Farming is main household income	La Sota	No	27.1125	No	No	Mbeya2
Female	Valid skip	Valid skip	Drinking water	4	No	No	No	Other	Farming is main household income	.a	No		No	Yes	Mbeya1
Female	Valid skip	Valid skip	Eyedrops	23	No	No	No	Community member	Farming is main household income	.a	No		No	Yes	Mbeya1
Female	Valid skip	Valid skip	Eyedrops	9	No	No	No	Chicken raising group	Farming is main household income	.a	No		No	No	Arusha1
Female	Cash	No	Eyedrops	36	Yes	No	Yes	Community member	Other main source of income	I-2	No	13.5563	No	No	Mbeya2
Female	Free	No	Drinking water	0	Yes	No	Yes	Livestock officer	Farming is main household income	I-2	Yes		Yes	No	Singida1
Female	Cash	No	Eyedrops	10	Yes	Yes	No	Community member	Farming is main household income	I-2	No	22.5938	No	No	Mbeya2
Female	Cash	Yes	Eyedrops	11	Yes	No	Yes	Livestock officer	Farming is main household income	I-2	Yes	22.5938	Yes	No	Singida1
Male	Cash	Yes	Drinking water	29	Yes	No	Yes	Community member	Farming is main household income	La Sota	No	4.51875	No	Yes	Mbeya1
Female	Valid skip	Valid skip	Eyedrops	22	No	No	No	Family member	Other main source of income	.a	No		No	No	Arusha1
Male	Cash	No	Eyedrops	21	Yes	No	Yes	Community member	Farming is main household income	La Sota	No	1.88281	Yes	No	Singida1
Male	Valid skip	Valid skip	Drinking water	7	No	Yes	No	Community member	Farming is main household income	.a	No		No	No	Mbeya2
Female	Cash	Yes	Eyedrops	6	Yes	No	No	Community member	Other main source of income	I-2	No	4.51875	No	Yes	Mbeya1
Male	Cash	Yes	Eyedrops	106	Yes	Yes	No	Media	Farming is main household income	I-2	No	3.19723	No	No	Mbeya2
Female	Cash	Yes	Drinking water	10	Yes	No	No	Family member	Farming is main household income	La Sota	No	2.82422	Yes	No	Singida1
Male	Valid skip	Valid skip	Drinking water	6	No	No	No	Family member	Other main source of income	.a	No		No	Yes	Mbeya1
Female	Cash	No	Eyedrops	4	Yes	Yes	Yes	Community member	Farming is main household income	La Sota	No	9.03751	No	No	Arusha1
Female	Cash	No	Drinking water	6	Yes	No	No	Other	Farming is main household income	La Sota	No	28.2422	No	No	Mbeya2
Female	Cash	Yes	Eyedrops	19	Yes	No	No	Agrovet shop	Other main source of income	I-2	No	2.25938	No	No	Arusha2
Male	Cash	No	Eyedrops	16	Yes	No	No	Other	Farming is main household income	La Sota	No	14.2697	No	Yes	Mbeya1
Female	Free	No	Eyedrops	13	Yes	No	No	NGO	Farming is main household income	I-2	No	0	No	No	Arusha1
Female	Valid skip	Valid skip	Drinking water	9	No	No	No	NGO	Farming is main household income	.a	No		No	No	Arusha1
Female	Cash	Yes	Drinking water	12	Yes	No	Yes	Livestock officer	Farming is main household income	La Sota	Yes	38.7322	No	No	Mbeya2
Male	Valid skip	Valid skip	Eyedrops	6	No	No	No	Friend	Farming is main household income	.a	No		No	No	Arusha2
Female	Free	No	Drinking water	38	Yes	No	No	Community member	Farming is main household income	I-2	No	0	No	No	Mbeya2
Male	Valid skip	Valid skip	Eyedrops	7	No	No	No	Community member	Farming is main household income	.a	No		No	Yes	Mbeya1
Male	Valid skip	Valid skip	Drinking water	11	No	No	No	Friend	Farming is main household income	.a	No		No	Yes	Mbeya1
Male	Cash	Yes	Drinking water	24	Yes	No	No	Community member	Farming is main household income	La Sota	No	1.50625	Yes	No	Singida1
Female	Cash	Yes	Eyedrops	22	Yes	No	Yes	Community member	Farming is main household income	La Sota	No	135.563	No	Yes	Mbeya1
Female	Cash	Yes	Drinking water	15	Yes	No	Yes	Friend	Other main source of income	La Sota	No	1.50625	No	Yes	Mbeya1
Male	Cash	Yes	Eyedrops	4	Yes	No	Yes	Community member	Farming is main household income	I-2	No	15.0625	No	Yes	Mbeya1
Female	Free	Yes	Eyedrops	17	Yes	No	No	Friend	Farming is main household income	La Sota	No	0	No	Yes	Mbeya1
Female	Cash	Yes	Eyedrops	7	Yes	No	Yes	Community member	Other main source of income	I-2	No	18.075	No	No	Singida2
Female	Free	No	Eyedrops	5	Yes	No	No	NGO	Farming is main household income	I-2	No		No	No	Arusha1
Female	Valid skip	Valid skip	Drinking water	21	No	No	No	Friend	Farming is main household income	.a	No		No	No	Arusha2
Male	Cash	No	Eyedrops	24	Yes	No	Yes	Livestock officer	Farming is main household income	I-2	Yes	8.36806	No	Yes	Mbeya1
Male	Cash	No	Eyedrops	1	Yes	No	No	Community member	Farming is main household income	I-2	No	24.6477	No	No	Mbeya2
Female	Valid skip	Valid skip	Eyedrops	3	No	No	No	Family member	Other main source of income	.a	No		No	No	Singida2
Female	Cash	Yes	Eyedrops	9	Yes	No	No	Community member	Farming is main household income	I-2	No	4.51875	No	No	Mbeya2
Female	Valid skip	Valid skip	Eyedrops	0	No	No	No	Family member	Farming is main household income	.a	No		No	No	Arusha2
Male	Cash	Yes	Drinking water	2	Yes	No	No	Community member	Farming is main household income	I-2	No	22.5938	No	No	Mbeya2
Male	Group contribution	Yes	Eyedrops	4	Yes	No	No	Livestock officer	Farming is main household income	I-2	Yes	9.03751	No	Yes	Mbeya1
Male	Group contribution	Yes	Eyedrops	13	Yes	Yes	Yes	Chicken raising group	Farming is main household income	La Sota	No	0.6025	Yes	No	Singida1
Female	Cash	No	Eyedrops	0	Yes	No	No	Family member	Farming is main household income	I-2	No	22.5938	No	Yes	Mbeya1
Female	Valid skip	Valid skip	Drinking water	4	No	No	No	Community member	Farming is main household income	.a	No		No	No	Arusha2
Female	Free	Yes	Eyedrops	15	Yes	No	No	Chicken raising group	Other main source of income	I-2	No		No	No	Arusha2
Female	Cash	Yes	Eyedrops	14	Yes	No	Yes	Community member	Farming is main household income	I-2	No	4.51875	No	No	Singida2
Female	Valid skip	Valid skip	Eyedrops	10	No	No	No	Family member	Farming is main household income	.a	No		Yes	No	Singida1
Male	Cash	No	Drinking water	7	Yes	Yes	No	Livestock officer	Farming is main household income	La Sota	Yes	0.6025	Yes	No	Singida1
Female	Free	Yes	Drinking water	8	Yes	No	No	Community member	Farming is main household income	I-2	No	0	No	No	Arusha1
Female	Cash	Yes	Eyedrops	13	Yes	No	Yes	Seminar	Farming is main household income	I-2	No	8.47266	No	No	Singida2
Female	Free	No	Drinking water	9	Yes	Yes	No	NGO	Farming is main household income	I-2	No	0	No	No	Arusha1
Female	Cash	Yes	Eyedrops	32	Yes	No	Yes	Friend	Farming is main household income	I-2	No	5.64844	No	No	Singida2
Female	Cash	No	Eyedrops	3	Yes	No	Yes	Friend	Farming is main household income	I-2	No		No	No	Mbeya2
Female	Group contribution	No	Drinking water	18	Yes	No	No	Community member	Farming is main household income	I-2	No	37.6563	No	No	Arusha2
Male	Cash	Yes	Eyedrops	9	Yes	No	No	Friend	Farming is main household income	I-2	No	4.51875	No	No	Singida2
Female	Free	No	Eyedrops	7	Yes	No	Yes	Friend	Farming is main household income	I-2	No	0	No	No	Arusha1
Male	Cash	No	Drinking water	0	Yes	No	No	Livestock officer	Farming is main household income	I-2	Yes	4.51875	Yes	No	Singida1
Female	Valid skip	Valid skip	Drinking water	5	No	No	No	Community member	Farming is main household income	.a	No		Yes	No	Singida1
Male	Valid skip	Valid skip	Eyedrops	0	No	No	No	Agrovet shop	Farming is main household income	.a	No		Yes	No	Singida1
Female	Group contribution	Yes	Drinking water	27	Yes	Yes	No	Chicken raising group	Other main source of income	I-2	No	1.12969	No	No	Arusha1
Male	Cash	Yes	Eyedrops	13	Yes	Yes	No	Chicken raising group	Other main source of income	La Sota	No	4.51875	Yes	No	Singida1
Male	Free	No	Eyedrops	0	Yes	No	No	Livestock officer	Farming is main household income	I-2	Yes	0	No	No	Mbeya2
Female	Free	No	Eyedrops	36	Yes	Yes	No	NGO	Farming is main household income	I-2	No	0	No	No	Arusha1
Male	Valid skip	Valid skip	Eyedrops	16	No	No	No	Livestock officer	Farming is main household income	.a	Yes		No	No	Arusha2
Female	Cash	No	Drinking water	2	Yes	No	Yes	Agrovet shop	Farming is main household income	La Sota	No	225.938	No	No	Mbeya2
Male	Cash	Yes	Drinking water	58	Yes	No	No	Agrovet shop	Farming is main household income	La Sota	No	4.91169	No	No	Mbeya2
Female	Cash	Yes	Eyedrops	3	Yes	No	No	Community member	Farming is main household income	I-2	No	5.31618	No	Yes	Mbeya1
Female	Cash	Yes	Drinking water	0	Yes	No	No	Other	Other main source of income	I-2	No	15.8156	No	No	Arusha2
Female	Cash	No	Eyedrops	13	Yes	No	Yes	Chicken raising group	Farming is main household income	La Sota	No	0	Yes	No	Singida1
Female	Cash	Yes	Drinking water	5	Yes	No	No	Friend	Farming is main household income	I-2	No	11.2969	No	Yes	Mbeya1
Male	Cash	No	Eyedrops	29	Yes	No	Yes	Other	Farming is main household income	I-2	No	2.36697	No	No	Singida2
Female	Valid skip	Valid skip	Eyedrops	0	No	No	No	Livestock officer	Farming is main household income	.a	Yes		Yes	No	Singida1
Female	Valid skip	Valid skip	Eyedrops	16	No	No	No	Community member	Farming is main household income	.a	No		No	Yes	Mbeya1
Female	Valid skip	Valid skip	Drinking water	3	No	No	No	Friend	Farming is main household income	.a	No		No	No	Mbeya2
Female	Cash	Yes	Eyedrops	6	Yes	No	Yes	Community member	Farming is main household income	I-2	No	9.03751	No	No	Arusha1
Female	Valid skip	Valid skip	Eyedrops	10	No	No	No	Chicken raising group	Other main source of income	.a	No		No	Yes	Mbeya1
Male	Valid skip	Valid skip	Eyedrops	8	No	No	No	Community member	Farming is main household income	.a	No		No	No	Singida2
Female	Free	No	Drinking water	2	Yes	No	No	NGO	Farming is main household income	I-2	No	0	No	No	Arusha1
Female	Valid skip	Valid skip	Eyedrops	23	No	No	No	Agrovet shop	Farming is main household income	.a	No		No	Yes	Mbeya1
Female	Valid skip	Valid skip	Drinking water	0	No	No	No	Livestock officer	Farming is main household income	.a	Yes		No	Yes	Mbeya1
Female	Cash	Invalid skip	Drinking water	27	Yes	No	No	Community member	Farming is main household income	La Sota	No	4.51875	No	No	Arusha1
Female	Valid skip	Valid skip	Eyedrops	0	No	No	No	Friend	Farming is main household income	.a	No		No	Yes	Mbeya1
Female	Cash	Yes	Eyedrops	10	Yes	No	No	Community member	Farming is main household income	La Sota	No	3.22768	No	No	Arusha1
Male	Cash	Yes	Drinking water	16	Yes	No	No	Friend	Farming is main household income	La Sota	No	12.3239	No	No	Mbeya2
Female	Cash	No	Drinking water	30	Yes	No	No	Community member	Farming is main household income	I-2	No		No	No	Arusha2
Female	Valid skip	No	Eyedrops	30	Yes	No	Yes	Livestock officer	Farming is main household income	I-2	Yes	6.77813	No	No	Singida2
Female	Cash	Yes	Eyedrops	4	Yes	No	Yes	Family member	Farming is main household income	La Sota	No	56.4844	No	No	Arusha2
Female	Cash	Yes	Eyedrops	11	Yes	No	Yes	Agrovet shop	Other main source of income	La Sota	No	15.8156	No	Yes	Mbeya1
Male	Cash	No	Drinking water	5	Yes	No	No	Friend	Farming is main household income	I-2	No	8.47266	No	No	Singida2
Female	Cash	Yes	Eyedrops	8	Yes	No	No	Community member	Farming is main household income	I-2	No	2.58214	No	No	Mbeya2
Female	Free	No	Eyedrops	13	Yes	Yes	No	NGO	Farming is main household income	I-2	No	0	No	No	Arusha1
Female	Cash	No	Drinking water	1	Yes	No	No	Community member	Farming is main household income	I-2	No	2.25938	No	No	Arusha2
Female	Cash	Yes	Drinking water	0	Yes	No	No	Community member	Farming is main household income	La Sota	No	18.8281	No	Yes	Mbeya1
Female	Cash	No	Eyedrops	8	Yes	No	No	Livestock officer	Farming is main household income	I-2	Yes	22.5938	No	No	Mbeya2
Male	Cash	Yes	Eyedrops	4	Yes	No	No	Friend	Farming is main household income	I-2	No	7.53125	Yes	No	Singida1
Female	Valid skip	Valid skip	Eyedrops	11	No	No	No	Friend	Farming is main household income	.a	No		No	No	Arusha2
Female	Free	Yes	Eyedrops	6	Yes	Yes	No	Chicken raising group	Farming is main household income	I-2	No		No	No	Arusha1
Female	Cash	Yes	Eyedrops	21	Yes	No	No	Community member	Farming is main household income	I-2	No	2.25938	No	No	Singida2
Female	Valid skip	Valid skip	Drinking water	16	No	No	No	Family member	Farming is main household income	.a	No		No	No	Mbeya2
Male	Valid skip	Valid skip	Drinking water	1	No	No	No	Community member	Other main source of income	.a	No		No	No	Arusha2
Male	Cash	Yes	Eyedrops	22	Yes	No	Yes	Friend	Other main source of income	I-2	No	12.3239	No	Yes	Mbeya1
Female	Free	No	Drinking water	20	Yes	Yes	No	NGO	Farming is main household income	I-2	No		No	No	Arusha1
Male	Cash	Yes	Eyedrops	9	Yes	No	No	Friend	Farming is main household income	I-2	No	22.5938	No	No	Singida2
Female	Cash	Yes	Eyedrops	25	Yes	No	Yes	Community member	Farming is main household income	I-2	No	9.03751	No	No	Singida2
Female	Free	No	Drinking water	43	Yes	Yes	Yes	NGO	Farming is main household income	I-2	No	0	No	No	Arusha1
Male	Cash	No	Drinking water	3	Yes	No	No	Livestock officer	Farming is main household income	I-2	Yes	26.3594	Yes	No	Singida1
Female	Cash	Yes	Drinking water	23	Yes	No	No	Seminar	Farming is main household income	La Sota	No	39.5391	No	No	Mbeya2
Female	Cash	Yes	Eyedrops	1	Yes	No	Yes	Family member	Farming is main household income	La Sota	No	15.0625	No	Yes	Mbeya1
Male	Valid skip	Valid skip	Drinking water	18	No	No	No	Community member	Farming is main household income	.a	No		No	No	Singida2
Female	Free	No	Eyedrops	3	Yes	No	No	NGO	Farming is main household income	I-2	No		No	No	Arusha1
Female	Valid skip	Valid skip	Drinking water	15	No	No	No	Friend	Other main source of income	.a	No		No	No	Arusha2
Male	Valid skip	Valid skip	Eyedrops	3	No	No	No	Agrovet shop	Farming is main household income	.a	No		No	Yes	Mbeya1
Female	Cash	Yes	Drinking water	6	Yes	No	No	Community member	Farming is main household income	La Sota	No	0	Yes	No	Singida1
Male	Cash	Yes	Drinking water	5	Yes	No	No	Friend	Farming is main household income	La Sota	No	0	Yes	No	Singida1
Male	Cash	Yes	Drinking water	40	Yes	No	Yes	Media	Other main source of income	La Sota	No	7.90782	No	Yes	Mbeya1
Male	Cash	Yes	Drinking water	10	Yes	No	No	Friend	Farming is main household income	La Sota	No	7.74643	No	No	Arusha1
Male	Valid skip	Valid skip	Drinking water	0	No	Yes	No	Community member	Farming is main household income	.a	No		No	Yes	Mbeya1
Female	Cash	Yes	Drinking water	11	Yes	No	Yes	Chicken raising group	Farming is main household income	La Sota	No	1.50625	Yes	No	Singida1
Female	Cash	No	Eyedrops	24	Yes	No	Yes	Livestock officer	Farming is main household income	I-2	Yes	0.684659	No	Yes	Mbeya1
Female	Valid skip	Valid skip	Drinking water	6	No	No	No	Friend	Farming is main household income	.a	No		No	No	Arusha1
Male	Cash	Yes	Eyedrops	13	Yes	No	No	Community member	Farming is main household income	La Sota	No	10.5438	No	No	Mbeya2
Male	Cash	Yes	Drinking water	20	Yes	No	Yes	Community member	Farming is main household income	I-2	No	2.25938	No	No	Singida2
Female	Cash	Yes	Drinking water	36	Yes	Yes	Yes	NGO	Other main source of income	La Sota	No	6.27605	No	No	Arusha1
Male	Cash	Yes	Eyedrops	12	Yes	No	No	Community member	Farming is main household income	La Sota	No	14.1211	No	Yes	Mbeya1
Male	Cash	No	Eyedrops	12	No	No	No	Livestock officer	Farming is main household income	.a	Yes	5.16429	No	No	Arusha1
Male	Cash	Yes	Eyedrops	8	Yes	Yes	Yes	Friend	Farming is main household income	I-2	No	1.12969	Yes	No	Singida1
Male	Valid skip	Valid skip	Drinking water	9	No	No	No	Community member	Farming is main household income	.a	No		No	No	Arusha2
Male	Valid skip	Valid skip	Eyedrops	13	No	No	No	Friend	Farming is main household income	.a	No		No	No	Mbeya2
Male	Valid skip	Valid skip	Drinking water	30	No	No	No	Friend	Farming is main household income	.a	No		No	No	Singida2
Female	Free	No	Eyedrops	10	Yes	Yes	No	Livestock officer	Farming is main household income	I-2	Yes		No	No	Arusha1
Female	Free	No	Eyedrops	2	Yes	No	No	NGO	Farming is main household income	I-2	No	0	No	No	Arusha1
Male	Other	Yes	Eyedrops	13	No	No	No	Community member	Other main source of income	.a	No		No	No	Arusha1
Female	Valid skip	Valid skip	Eyedrops	8	No	No	No	Family member	Farming is main household income	.a	No		No	Yes	Mbeya1
Female	Free	Yes	Drinking water	18	Yes	Yes	No	Community member	Farming is main household income	I-2	No	0	No	No	Arusha1
Female	Free	No	Drinking water	11	Yes	Yes	No	Livestock officer	Other main source of income	I-2	Yes	2.25938	No	No	Arusha1
Female	Valid skip	Valid skip	Drinking water	5	No	No	No	Community member	Farming is main household income	.a	No		No	Yes	Mbeya1
Female	Cash	No	Drinking water	5	Yes	No	No	NGO	Farming is main household income	I-2	No	9.03751	No	No	Arusha1
Male	Cash	Yes	Drinking water	20	Yes	No	Yes	Community member	Farming is main household income	La Sota	No	13.5563	No	No	Mbeya2
Male	Valid skip	Valid skip	Eyedrops	1	No	No	No	Other	Farming is main household income	.a	No		No	No	Mbeya2
Female	Cash	Yes	Eyedrops	9	Yes	No	Yes	Community member	Farming is main household income	I-2	No	4.51875	No	No	Singida2
Female	Cash	Yes	Eyedrops	11	Yes	No	Yes	Friend	Farming is main household income	I-2	No	2.25938	No	No	Singida2
Female	Cash	Yes	Drinking water	8	Yes	Yes	Yes	Chicken raising group	Farming is main household income	La Sota	No	5.89403	No	No	Arusha1
Female	Cash	Yes	Drinking water	21	Yes	No	Yes	Livestock officer	Other main source of income	La Sota	Yes	4.75658	Yes	No	Singida1
Male	Valid skip	Valid skip	Drinking water	23	No	No	No	Friend	Farming is main household income	.a	No		No	Yes	Mbeya1
Female	Cash	No	Eyedrops	3	Yes	No	No	Chicken raising group	Farming is main household income	I-2	No	1.58553	No	No	Singida2
Female	Cash	No	Drinking water	10	Yes	No	No	Livestock officer	Farming is main household income	I-2	Yes	15.8156	No	No	Mbeya2
Female	Valid skip	Valid skip	Eyedrops	4	No	No	No	Chicken raising group	Farming is main household income	.a	No		Yes	No	Singida1
Female	Cash	Yes	Eyedrops	1	Yes	No	Yes	Community member	Farming is main household income	I-2	No	2.25938	No	No	Singida2
Female	Valid skip	Valid skip	Drinking water	13	No	No	No	Livestock officer	Farming is main household income	.a	Yes		Yes	No	Singida1
Female	Cash	No	Eyedrops	25	Yes	No	Yes	Family member	Farming is main household income	I-2	No	10.845	No	No	Mbeya2
Female	Valid skip	Valid skip	Drinking water	15	No	No	No	Community member	Farming is main household income	.a	No		No	No	Arusha2
Female	Free	No	Drinking water	6	Yes	Yes	No	NGO	Farming is main household income	I-2	No	0	No	No	Arusha1
Female	Valid skip	Valid skip	Eyedrops	1	No	No	No	Community member	Farming is main household income	.a	No		No	No	Mbeya2
Male	Cash	No	Eyedrops	13	Yes	No	No	Livestock officer	Farming is main household income	La Sota	Yes	19.7695	No	No	Mbeya2
Female	Valid skip	Valid skip	Drinking water	3	No	No	No	Community member	Farming is main household income	.a	No		No	Yes	Mbeya1
Female	Cash	Yes	Drinking water	4	Yes	No	No	Community member	Farming is main household income	La Sota	No	15.0625	No	Yes	Mbeya1
Male	Cash	No	Drinking water	20	Yes	No	No	Livestock officer	Farming is main household income	I-2	Yes	7.18893	No	Yes	Mbeya1
Female	Group contribution	No	Eyedrops	12	Yes	No	No	Livestock officer	Other main source of income	La Sota	Yes	2.25938	Yes	No	Singida1
Female	Free	No	Eyedrops	0	Yes	No	No	Community member	Farming is main household income	I-2	No		No	No	Arusha1
Male	Cash	Yes	Drinking water	23	Yes	No	Yes	Community member	Farming is main household income	I-2	No	22.5938	No	No	Mbeya2
Female	Free	No	Eyedrops	7	Yes	Yes	Yes	Seminar	Farming is main household income	I-2	No	0	No	No	Arusha1
Female	Cash	Yes	Eyedrops	2	Yes	No	No	Livestock officer	Farming is main household income	I-2	Yes	13.5563	No	No	Mbeya2
Female	Cash	Yes	Eyedrops	27	Yes	No	Yes	Livestock officer	Other main source of income	La Sota	Yes	9.03751	Yes	No	Singida1
Female	Valid skip	Valid skip	Drinking water	30	No	No	No	Other	Other main source of income	.a	No		No	Yes	Mbeya1
Female	Cash	Yes	Eyedrops	4	Yes	Yes	No	Chicken raising group	Farming is main household income	La Sota	No	1.61384	Yes	No	Singida1
Male	Cash	Yes	Eyedrops	0	Yes	No	Yes	NGO	Farming is main household income	I-2	No	7.53125	No	No	Arusha1
Female	Free	No	Drinking water	42	Yes	Yes	No	Chicken raising group	Other main source of income	I-2	No		No	No	Arusha1
Female	Cash	Yes	Eyedrops	10	Yes	No	Yes	Community member	Farming is main household income	I-2	No	9.03751	No	No	Arusha2
Female	Valid skip	Valid skip	Drinking water	21	No	No	No	Livestock officer	Farming is main household income	.a	Yes		No	No	Mbeya2
Female	Cash	Yes	Eyedrops	18	Yes	Yes	Yes	NGO	Farming is main household income	I-2	No	1.69453	No	No	Arusha1
Male	Free	Yes	Eyedrops	5	Yes	No	No	Livestock officer	Farming is main household income	La Sota	Yes	9.03751	Yes	No	Singida1
Female	Cash	No	Drinking water	8	Yes	No	Yes	Livestock officer	Farming is main household income	I-2	Yes	13.5563	No	No	Mbeya2
Male	Cash	Yes	Eyedrops	15	Yes	Yes	No	Friend	Farming is main household income	La Sota	No	12.5521	No	No	Singida2
Female	Free	No	Drinking water	9	Yes	Yes	Yes	NGO	Farming is main household income	La Sota	No	0	No	No	Arusha1
Male	Free	No	Eyedrops	8	Yes	No	No	NGO	Farming is main household income	I-2	No	0	No	No	Arusha1
Female	Free	No	Eyedrops	3	Yes	Yes	No	Livestock officer	Farming is main household income	I-2	Yes	0	No	No	Arusha1
Male	Valid skip	Valid skip	Eyedrops	6	No	No	No	Livestock officer	Farming is main household income	.a	Yes		No	No	Arusha2
Female	Free	No	Drinking water	10	Yes	No	No	Community member	Farming is main household income	I-2	No		No	No	Mbeya2
Female	Valid skip	Valid skip	Eyedrops	0	No	No	No	Livestock officer	Farming is main household income	.a	Yes		No	No	Arusha2
Female	Free	No	Eyedrops	24	Yes	No	No	Community member	Other main source of income	I-2	No		No	No	Arusha1
Male	Valid skip	Valid skip	Drinking water	0	No	No	No	Community member	Farming is main household income	.a	No		No	No	Arusha2
Male	Cash	Yes	Eyedrops	16	Yes	No	No	Family member	Farming is main household income	I-2	No	2.25938	No	No	Arusha1
Female	Cash	Yes	Eyedrops	31	Yes	No	Yes	Seminar	Farming is main household income	I-2	No	4.51875	No	No	Singida2
Female	Valid skip	Valid skip	Drinking water	0	No	No	No	Community member	Farming is main household income	.a	No		No	No	Arusha2
Female	Group contribution	Yes	Drinking water	15	Yes	Yes	Yes	Seminar	Farming is main household income	La Sota	No	0.6025	Yes	No	Singida1
Female	Free	No	Drinking water	9	Yes	No	No	Livestock officer	Farming is main household income	La Sota	Yes	0	No	No	Arusha1
Female	Valid skip	Valid skip	Eyedrops	8	No	No	No	Livestock officer	Farming is main household income	.a	Yes		No	No	Arusha2
Female	Valid skip	Valid skip	Eyedrops	1	No	No	No	Community member	Farming is main household income	.a	No		No	No	Arusha2
Female	Valid skip	Valid skip	Drinking water	2	No	No	No	Community member	Farming is main household income	.a	No		No	No	Mbeya2
Female	Cash	Yes	Drinking water	12	Yes	No	No	Friend	Other main source of income	I-2	No	13.2905	No	No	Singida2
Female	Valid skip	Valid skip	Drinking water	0	No	No	No	Community member	Farming is main household income	.a	No		No	No	Arusha2
Female	Free	No	Eyedrops	12	Yes	No	No	Livestock officer	Farming is main household income	I-2	Yes	0	No	No	Arusha1
Male	Cash	Yes	Eyedrops	7	Yes	No	Yes	Friend	Farming is main household income	I-2	No	10.9741	No	No	Mbeya2
Male	Valid skip	Valid skip	Drinking water	8	No	No	No	Media	Farming is main household income	.a	No		Yes	No	Singida1
Male	Cash	Yes	Eyedrops	16	Yes	No	No	Friend	Farming is main household income	I-2	No	2.25938	No	No	Singida2
Male	Valid skip	Valid skip	Drinking water	5	No	No	No	Livestock officer	Other main source of income	.a	Yes		No	Yes	Mbeya1
Female	Cash	Yes	Drinking water	8	Yes	Yes	Yes	NGO	Farming is main household income	La Sota	No	37.6563	No	No	Arusha1
Female	Cash	Yes	Eyedrops	5	Yes	No	Yes	Community member	Farming is main household income	La Sota	No	11.2969	No	Yes	Mbeya1
Female	Valid skip	Valid skip	Drinking water	0	No	No	No	Community member	Farming is main household income	.a	No		No	No	Arusha2
Female	Cash	No	Eyedrops	1	Yes	No	No	Community member	Farming is main household income	I-2	No		No	No	Singida2
Female	Cash	No	Eyedrops	5	Yes	No	Yes	Friend	Farming is main household income	I-2	No	9.88477	No	No	Mbeya2
Female	Cash	Yes	Drinking water	13	Yes	No	Yes	Friend	Farming is main household income	I-2	No	7.28831	No	No	Singida2
Male	Cash	Yes	Eyedrops	49	Yes	No	Yes	Community member	Farming is main household income	I-2	No	27.1125	No	No	Singida2
Female	Cash	No	Eyedrops	0	Yes	No	Yes	Family member	Farming is main household income	I-2	No		No	No	Mbeya2
Female	Cash	Yes	Drinking water	48	Yes	No	Yes	Family member	Farming is main household income	I-2	No	5.27188	No	Yes	Mbeya1
